# Supplementary material for: Tailoring interlayer magnetic coupling to modify the magnetic properties of FeCl2 bilayers by self-intercalation
Source: Royal Society of Chemistry journal article supplement (doi:10.1039/d2tc03228g), 2022-01-01
Supplement: d2tc03228g1.pdf [file d2tc03228g1.pdf]

## Supporting Information

### **Tailoring interlayer magnetic coupling to modify magnetic properties of FeCl<sub>2</sub> bilayer by self-intercalation**

Rui Li, Jiawei Jiang, Haili Bai\*, Wenbo Mi\*

*Tianjin Key Laboratory of Low Dimensional Materials Physics and Preparation Technology, School of Science, Tianjin University, Tianjin 300354, China*

---

\* Author to whom all correspondence should be addressed.

E-mail: [baihaili@tju.edu.cn](mailto:baihaili@tju.edu.cn)

E-mail: [miwenbo@tju.edu.cn](mailto:miwenbo@tju.edu.cn)

**Table S1** Lattice constant  $a$  (Å), interlayer distance  $d$  (Å), bond length  $d_{\text{Fe-Cl}}$  (Å) of Fe-Cl, bond angle  $\theta_1$  (°) of Cl-Fe-Cl,  $\theta_2$  (°) of Fe-Cl-Fe, formation energy  $E_f$  (eV) and magnetic ground state of FeCl<sub>2</sub> bilayer.

| $a$   | $d$    | $d_{\text{Fe-Cl}}$ | $\theta_1$ | $\theta_2$ | $E_f$  | Magnetic ground |
|-------|--------|--------------------|------------|------------|--------|-----------------|
| 3.507 | 3.0667 | 2.459              | 89.132     | 90.750     | -0.895 | AFM             |

**Table S2** Neighboring number of exchange constants in self-intercalated FeCl<sub>2</sub> bilayer with different concentrations.

|                     | 11% | 25% | 33% | 67% | 100% |
|---------------------|-----|-----|-----|-----|------|
| $J_{\text{intra1}}$ | 108 | 48  | 36  | 36  | 12   |
| $J_{\text{inter1}}$ | 18  | 8   | 6   | 6   | 2    |
| $J_{\text{intra2}}$ | 6   | 6   | 6   | 6   | 6    |
| $J_{\text{inter2}}$ | 4   | 4   | 4   | 8   | 4    |

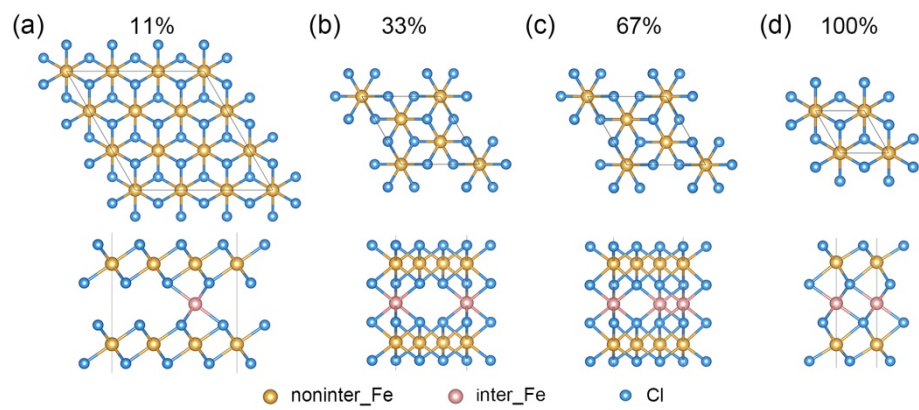

**Fig. S1** Top and side views of Fe-intercalated  $\text{FeCl}_2$  bilayer with concentration of (a) 11%, (b) 33%, (c) 67% and (d) 100%.

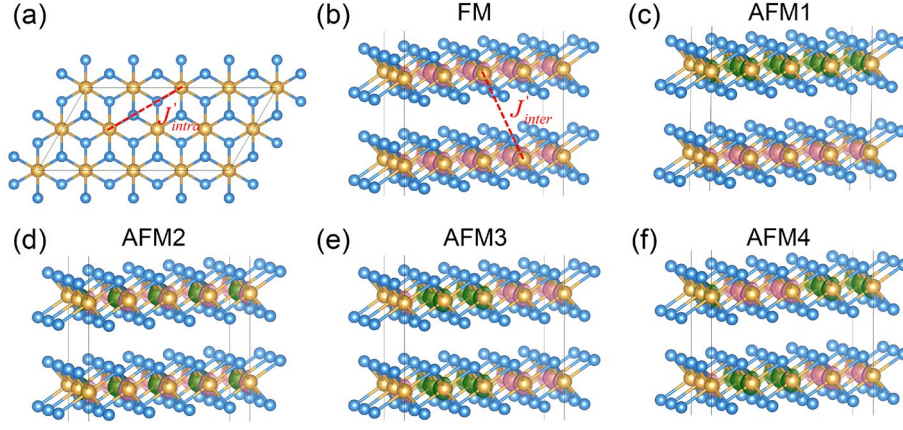

**Fig. S2** (a) Top view of  $\text{FeCl}_2$  bilayer of  $2 \times 4 \times 1$  supercell. (b)-(f) Spin charge density of five different magnetic configurations. Pink and green areas represent the opposite spin states. The isosurface is  $0.070 \text{ e/Bohr}^3$ .

The energy contributed by magnetic interaction in these magnetic orders in a unit cell can be expressed as

$$E_{FM} = E_0 - \left( 6J_{intra} + 6J'_{intra} + J_{inter} + 6J'_{inter} \right) S^2 \quad (\text{S1})$$

$$E_{AFM1} = E_0 - \left( 6J_{intra} + 6J'_{intra} - J_{inter} - 6J'_{inter} \right) S^2 \quad (\text{S2})$$

$$E_{AFM2} = E_0 + \left( 2J_{intra} + 2J'_{intra} - J_{inter} + 2J'_{inter} \right) S^2 \quad (\text{S3})$$

$$E_{AFM3} = E_0 - \left( 2J_{intra} - 2J'_{intra} + J_{inter} + 2J'_{inter} \right) S^2 \quad (\text{S4})$$

$$E_{AFM4} = E_0 - \left( 2J_{intra} - 2J'_{intra} - J_{inter} - 2J'_{inter} \right) S^2 \quad (\text{S5})$$

Here,  $J_{intra}$  and  $J_{inter}$  are the nearest-neighbor exchange constants of intralayer and interlayer, In Fig.

S1a and b,  $J'_{intra}$  and  $J'_{inter}$  are the second-nearest-neighbor exchange constants. The  $J>0$  denotes the ferromagnetic order, while the  $J<0$  represents the antiferromagnetic order. To investigate the contributions from more distant interaction, the second-nearest-neighbor exchange interaction are included in FeCl<sub>2</sub> bilayer. The  $J_{intra}$ ,  $J_{inter}$ ,  $J'_{intra}$  and  $J'_{inter}$  are 5.117, 0.241, -0.227 and -0.111 meV, respectively. The second-nearest-neighbor exchange constants are smaller than the nearest-neighbor exchange constants, so the second-nearest-neighbor magnetic coupling will not be considered in this work.

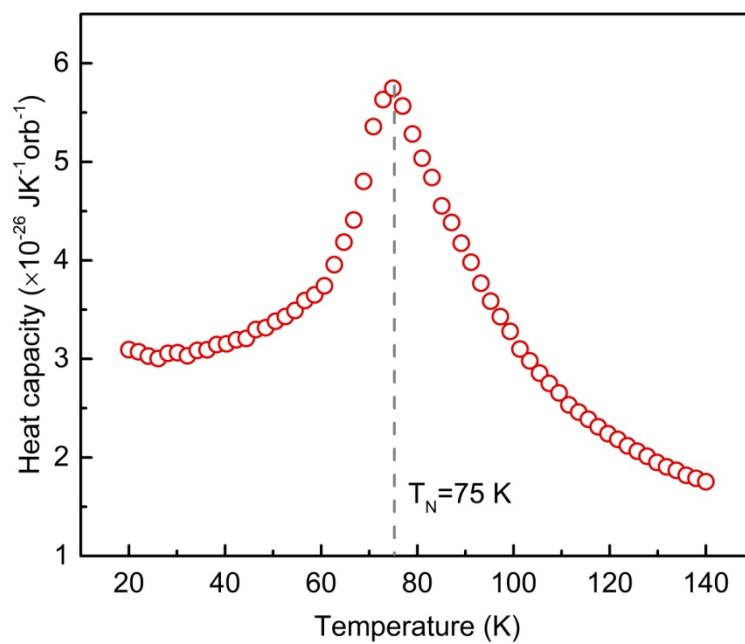

**Fig. S3** Specific heat capacity as a function of temperature of the  $\text{FeCl}_2$  bilayer.

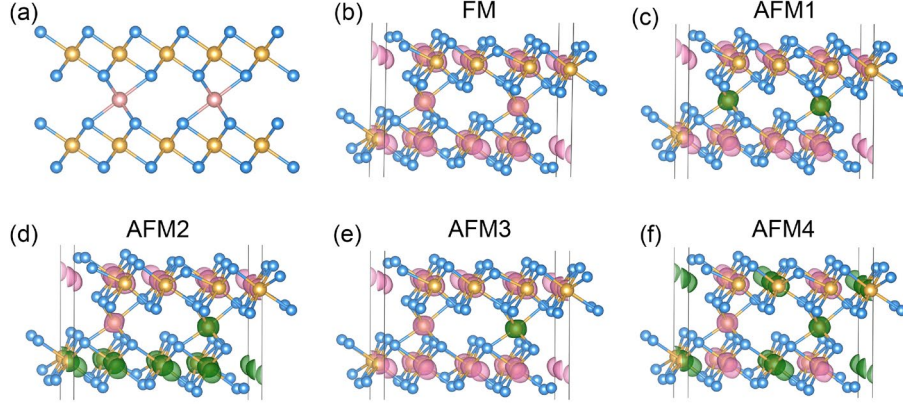

**Fig. S4** (a) Side view of 25% Fe-intercalated FeCl<sub>2</sub> bilayer. The red dash lines represent the exchange interaction between Fe sites. (b)-(f) Spin charge density of five different magnetic configurations. Pink and green areas represent the opposite spin states. The isosurface is 0.070 e/Bohr<sup>3</sup>.

The energy contributed by magnetic interaction in these magnetic orders in a unit cell can be expressed as

$$E_{FM} = E_0 - \left( 12J_{intra1} + \frac{3}{2}J_{inter1} + J_{intra2} + \frac{3}{2}J_{inter2} \right) S^2 \quad (S6)$$

$$E_{AFM1} = E_0 - \left( 12J_{intra1} + \frac{3}{2}J_{inter1} - J_{intra2} + 2J_{inter2} \right) S^2 \quad (S7)$$

$$E_{AFM2} = E_0 - \left( 12J_{intra1} - \frac{1}{2}J_{inter1} - 2J_{inter2} \right) S^2 \quad (S8)$$

$$E_{AFM3} = E_0 - \left( 12J_{intra1} - \frac{1}{2}J_{inter1} + 2J_{inter2} \right) S^2 \quad (S9)$$



$$E_{AFM4} = E_0 + \left( 4J_{intra1} + \frac{1}{2}J_{inter1} - 2J_{inter2} \right) S^2 \quad (\text{S10})$$

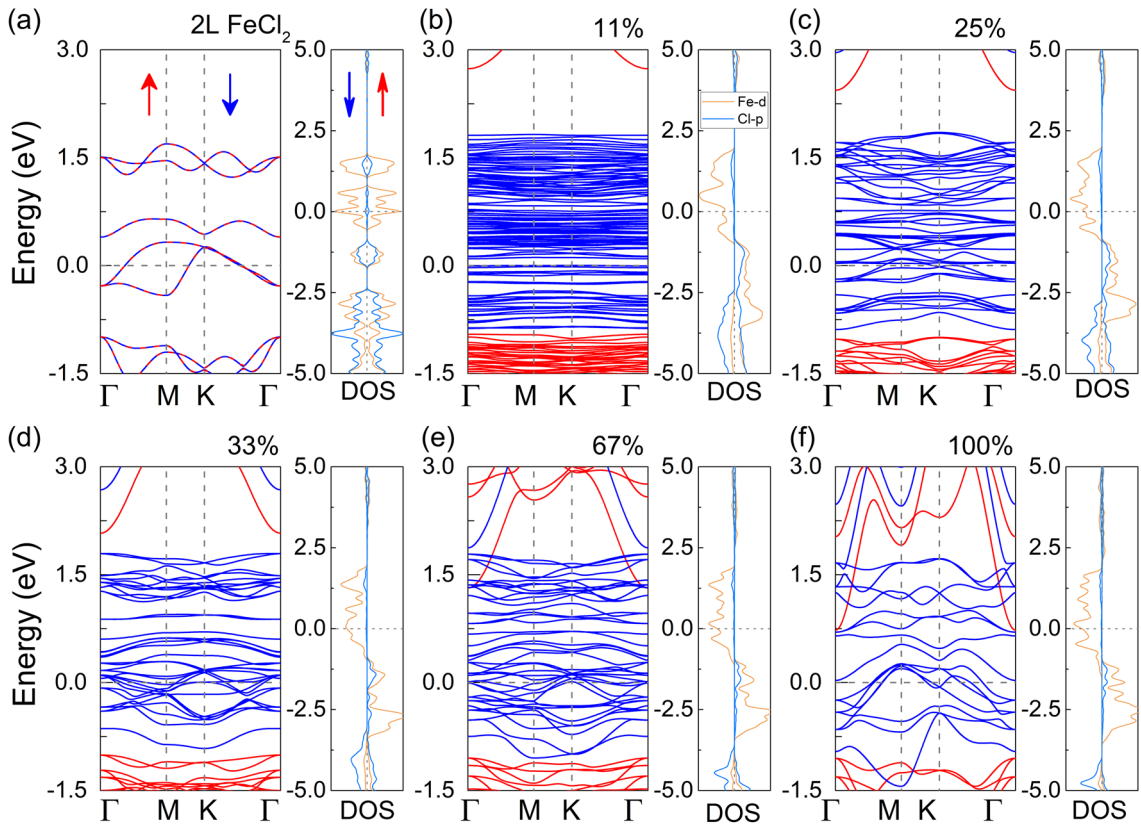

**Fig. S5** Band structures and projected density of states of (a)  $\text{FeCl}_2$  bilayer, (b) 11%, (c) 25%, (d) 33%, (e) 67% and (f) 100% Fe-intercalated  $\text{FeCl}_2$  bilayer. The Fermi level is set at 0 eV.
